# Supplementary material for: Development of a memetic clustering algorithm for optimal spectral histology: application to FTIR images of normal human colon
Source: Royal Society of Chemistry journal article supplement (doi:10.1039/c5an02227d), 2016-01-01
Supplement: c5an02227d1.pdf [file c5an02227d1.pdf]

## Electronic supplementary information (ESI)

### List of Tables

|    |                                                                                                                                                                                                                                                                     |   |
|----|---------------------------------------------------------------------------------------------------------------------------------------------------------------------------------------------------------------------------------------------------------------------|---|
| S1 | Mean $\bar{f}$ and standard deviation $\sigma$ of the partition quality measures computed over 100 replicates for KM, and 10 for MC, GKA and GABC. For each patient, bold values represent the smallest $\bar{f}$ among the four tested clustering methods. . . . . | 3 |
|----|---------------------------------------------------------------------------------------------------------------------------------------------------------------------------------------------------------------------------------------------------------------------|---|

### List of Figures

|    |                                                                                                                                                                                                                                                                                                                                                      |   |
|----|------------------------------------------------------------------------------------------------------------------------------------------------------------------------------------------------------------------------------------------------------------------------------------------------------------------------------------------------------|---|
| S1 | Comparison of raw (a) and EMSC preprocessed (b) spectra acquired on patient #1. Standard deviations (shaded area) are shown overlaying the mean spectra (black solid lines). . . . .                                                                                                                                                                 | 4 |
| S2 | Comparison between conventional histology and pseudo-color-coded images reconstructed from KM and MC partitions for patient #2. Scale bars indicate 100 $\mu\text{m}$ . The quality measure $f$ of each partition is provided above each pseudo-color-coded image. The cluster assignments are detailed below each pseudo-color-coded image. . . . . | 5 |
| S3 | Comparison between conventional histology and pseudo-color-coded images reconstructed from KM and MC partitions for patient #3. Scale bars indicate 100 $\mu\text{m}$ . The quality measure $f$ of each partition is provided above each pseudo-color-coded image. The cluster assignments are detailed below each pseudo-color-coded image. . . . . | 6 |
| S4 | Comparison between conventional histology and pseudo-color-coded images reconstructed from KM and MC partitions for patient #4. Scale bars indicate 100 $\mu\text{m}$ . The quality measure $f$ of each partition is provided above each pseudo-color-coded image. The cluster assignments are detailed below each pseudo-color-coded image. . . . . | 7 |
| S5 | Comparison between conventional histology and pseudo-color-coded images reconstructed from KM and MC partitions for patient #5. Scale bars indicate 100 $\mu\text{m}$ . The quality measure $f$ of each partition is provided above each pseudo-color-coded image. The cluster assignments are detailed below each pseudo-color-coded image. . . . . | 8 |

S6 Comparison between conventional histology and pseudo-color-coded images reconstructed from MC, GKA and GABC partitions for patient #1. Scale bars indicate 100  $\mu\text{m}$ . The quality measure  $f$  of each partition is provided above each pseudo-color-coded image. The cluster assignments are detailed below each pseudo-color-coded image. . . . . 9

| <i>Patient</i> | $\bar{f} \pm \sigma$ |                             |                      |                      |
|----------------|----------------------|-----------------------------|----------------------|----------------------|
|                | <i>KM</i>            | <i>MC</i>                   | <i>GKA</i>           | <i>GABC</i>          |
| #6             | 10.2551 $\pm$ 0.4134 | <b>9.8608</b> $\pm$ 0.0198  | 9.886 $\pm$ 0.0123   | 11.2873 $\pm$ 0.4531 |
| #7             | 4.3107 $\pm$ 0.0521  | <b>4.226</b> $\pm$ 0.0001   | 4.2282 $\pm$ 0.0027  | 4.8626 $\pm$ 0.1131  |
| #8             | 7.4039 $\pm$ 0.2042  | <b>7.1419</b> $\pm$ 0.00003 | 7.1425 $\pm$ 0.0006  | 8.1197 $\pm$ 0.1988  |
| #9             | 12.9793 $\pm$ 0.2487 | <b>12.7084</b> $\pm$ 0.0001 | 12.7099 $\pm$ 0.0013 | 14.5747 $\pm$ 0.6804 |
| #10            | 8.4715 $\pm$ 0.0795  | <b>8.3419</b> $\pm$ 0.0047  | 8.3488 $\pm$ 0.0189  | 9.3445 $\pm$ 0.1793  |
| #11            | 18.9947 $\pm$ 0.489  | <b>18.2972</b> $\pm$ 0.0097 | 18.3225 $\pm$ 0.0215 | 21.5243 $\pm$ 0.5589 |
| #12            | 6.2882 $\pm$ 0.1504  | <b>6.0691</b> $\pm$ 0.005   | 6.0723 $\pm$ 0.0001  | 7.3884 $\pm$ 0.365   |
| #13            | 7.6362 $\pm$ 0.0824  | <b>7.558</b> $\pm$ 0.00004  | 7.558 $\pm$ 0.00003  | 8.7269 $\pm$ 0.2127  |
| #14            | 21.8311 $\pm$ 0.1574 | <b>21.6353</b> $\pm$ 0.0002 | 21.6363 $\pm$ 0.0009 | 25.12 $\pm$ 0.755    |
| #15            | 6.1889 $\pm$ 0.1068  | <b>6.0319</b> $\pm$ 0.0008  | 6.0329 $\pm$ 0.0016  | 6.8544 $\pm$ 0.2361  |

Table S1: Mean  $\bar{f}$  and standard deviation  $\sigma$  of the partition quality measures computed over 100 replicates for KM, and 10 for MC, GKA and GABC. For each patient, bold values represent the smallest  $\bar{f}$  among the four tested clustering methods.

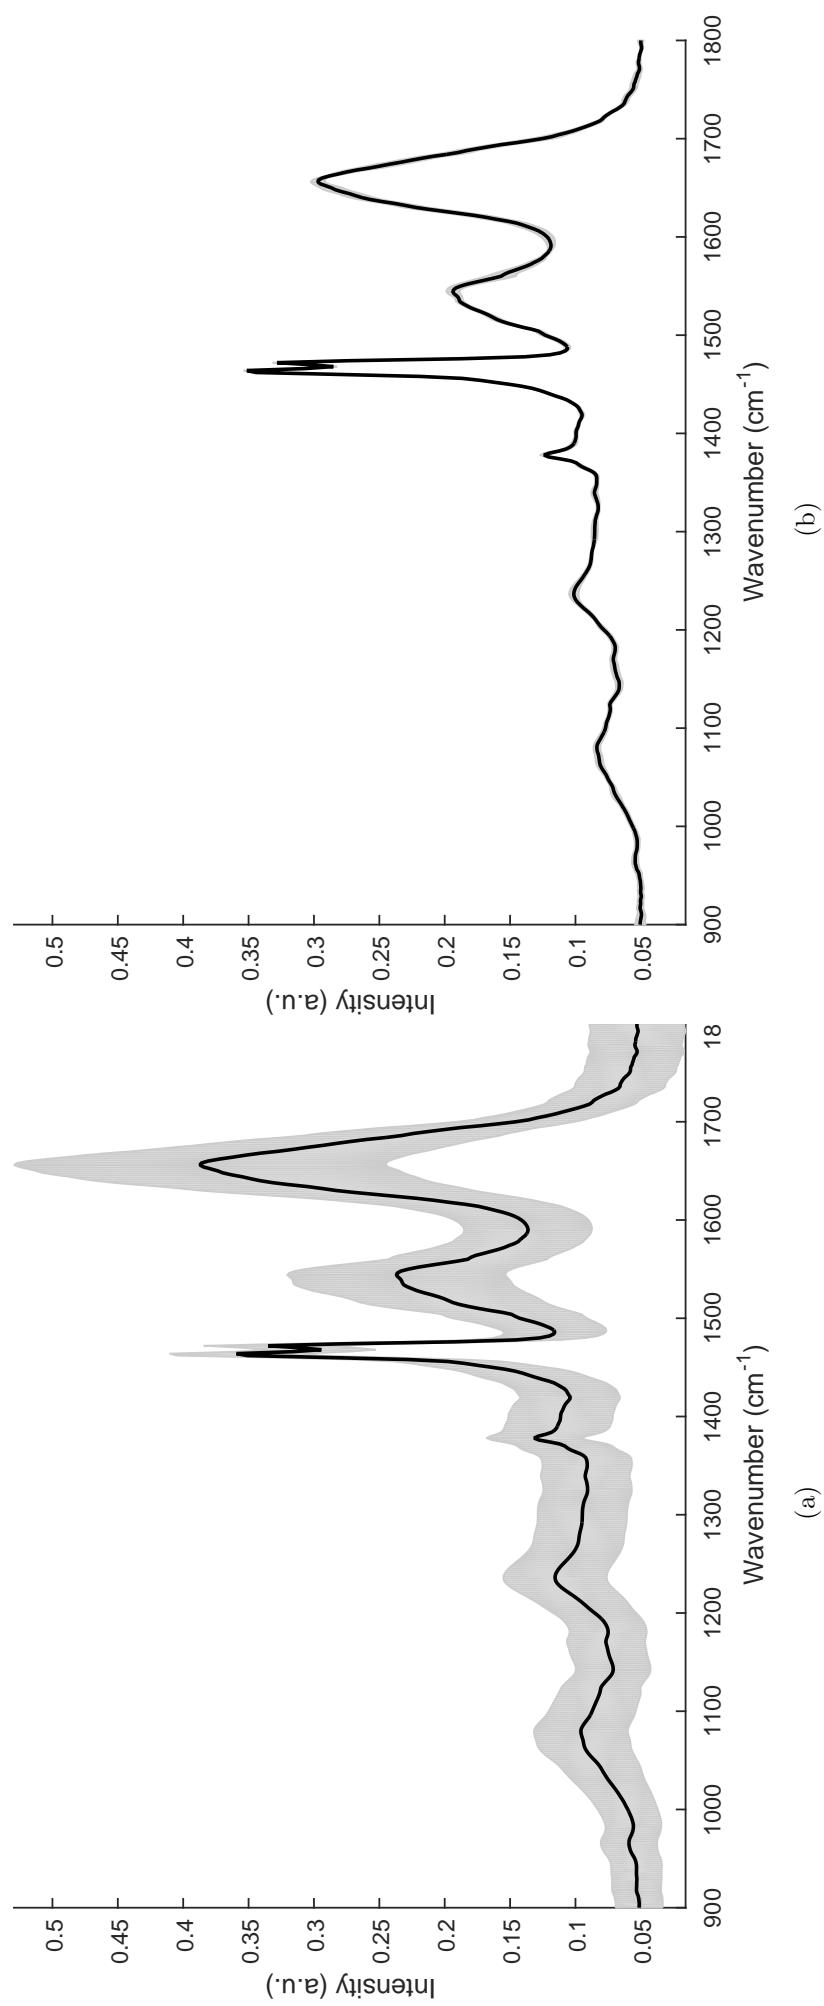

Figure S1: Comparison of raw (a) and EMSC preprocessed (b) spectra acquired on patient #1. Standard deviations (shaded area) are shown overlaying the mean spectra (black solid lines).

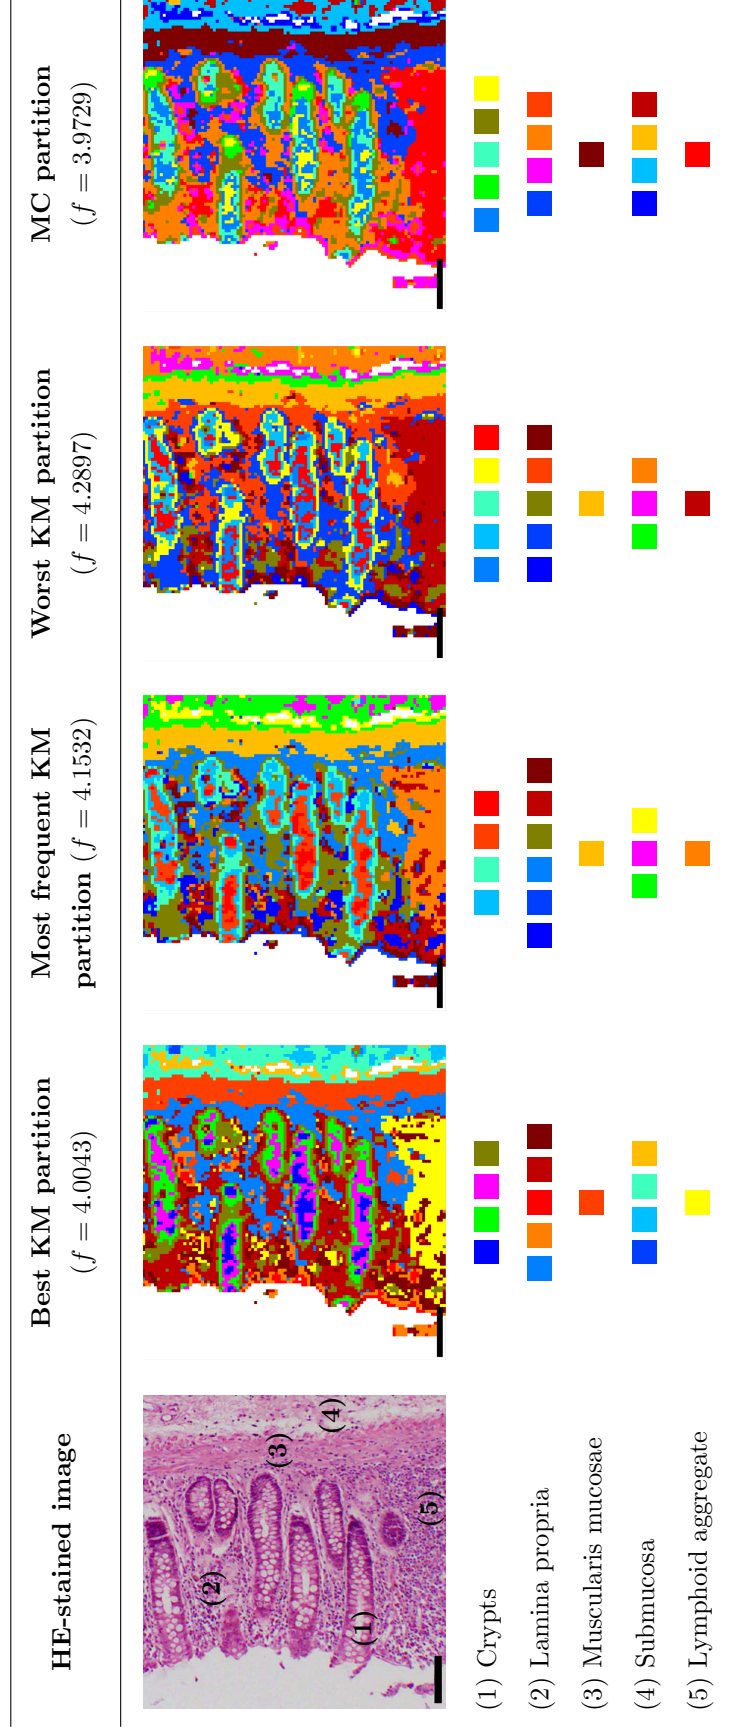

Figure S2: Comparison between conventional histology and pseudo-color-coded images reconstructed from KM and MC partitions for patient #2. Scale bars indicate 100  $\mu\text{m}$ . The quality measure  $f$  of each partition is provided above each pseudo-color-coded image. The cluster assignments are detailed below each pseudo-color-coded image.

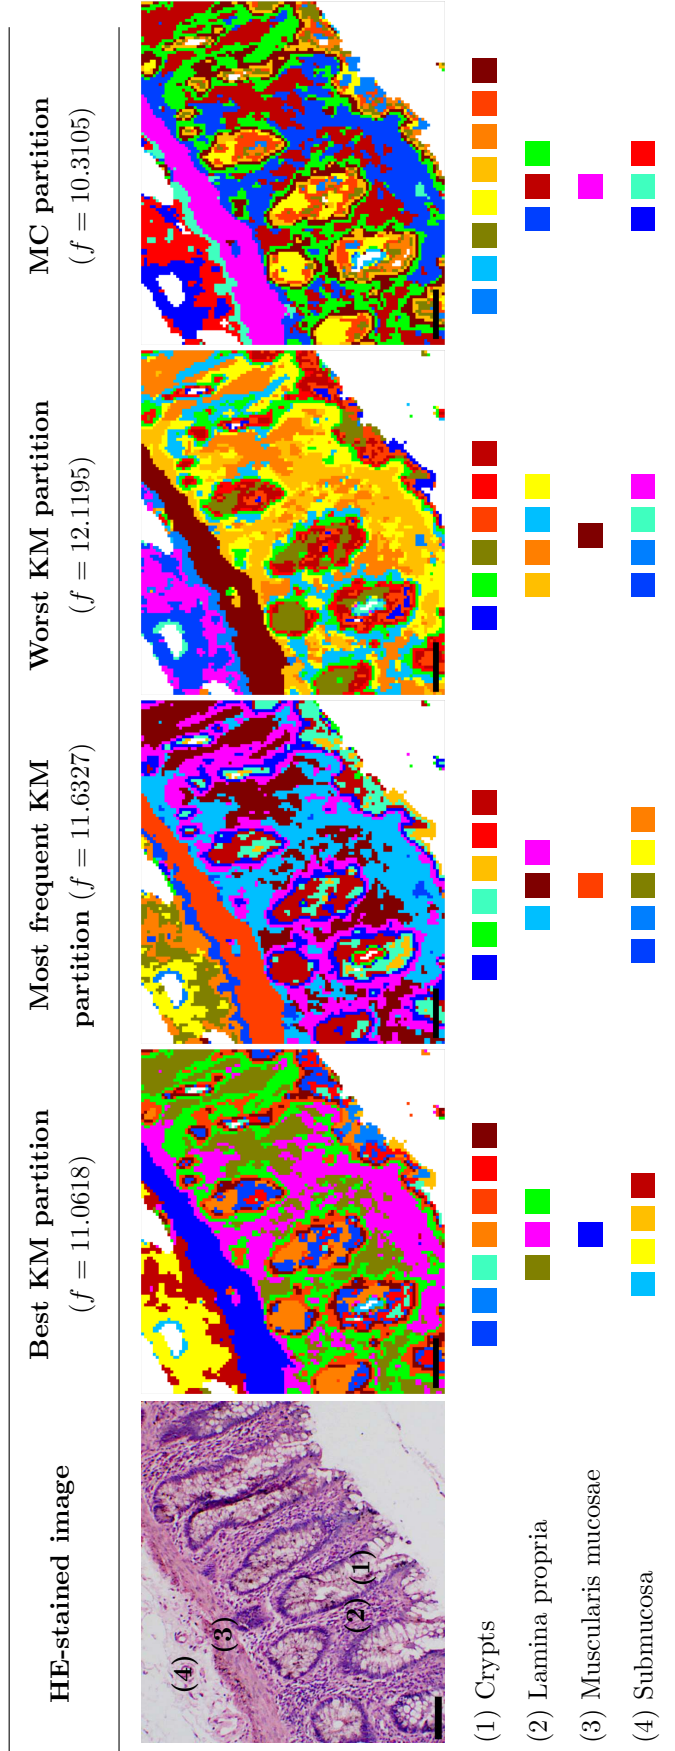

Figure S3: Comparison between conventional histology and pseudo-color-coded images reconstructed from KM and MC partitions for patient #3. Scale bars indicate 100  $\mu\text{m}$ . The quality measure  $f$  of each partition is provided above each pseudo-color-coded image. The cluster assignments are detailed below each pseudo-color-coded image.

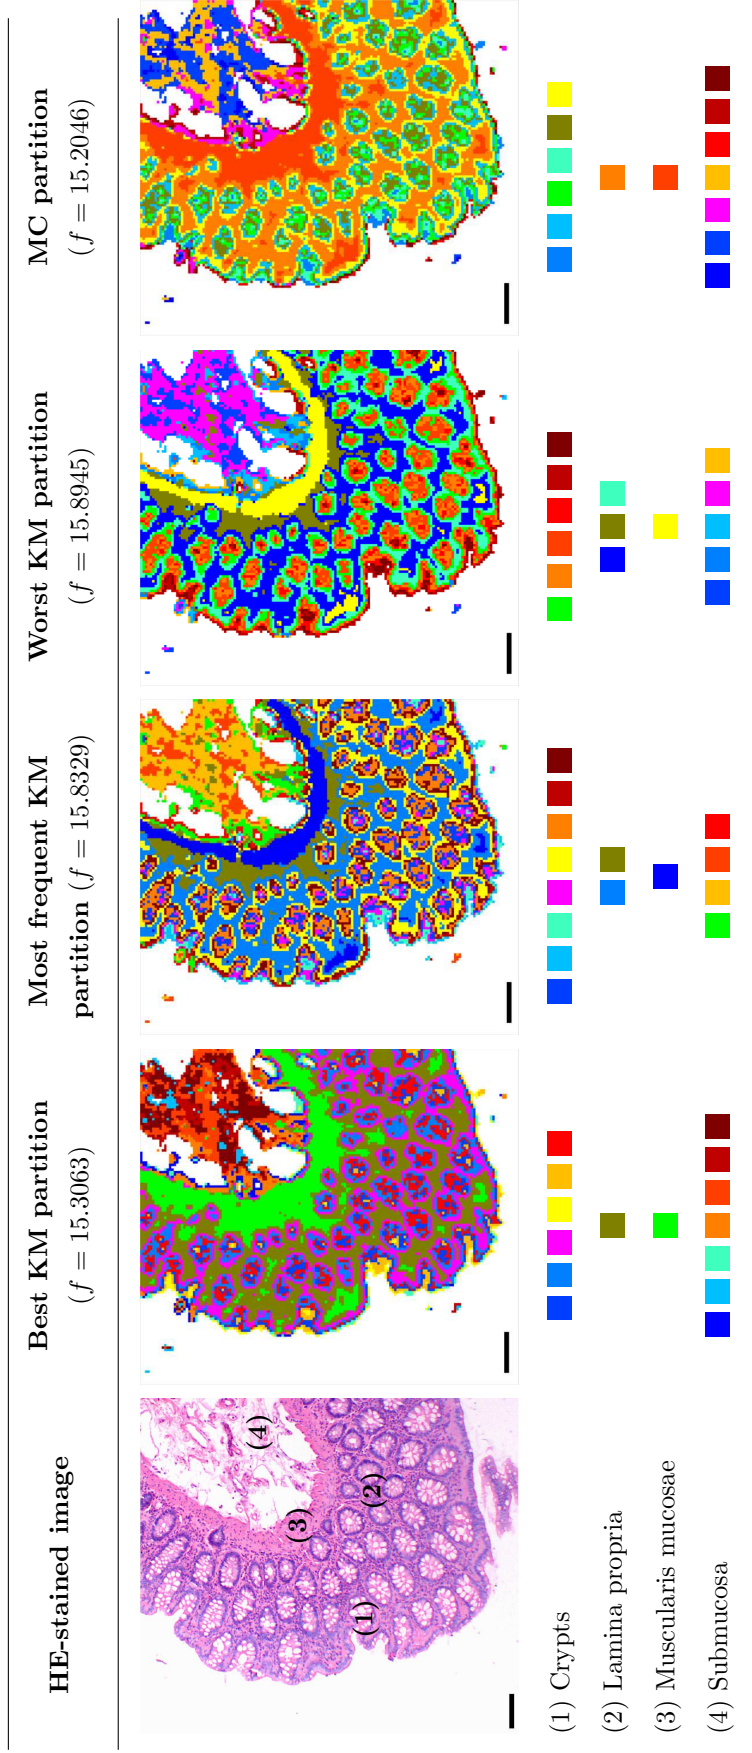

Figure S4: Comparison between conventional histology and pseudo-color-coded images reconstructed from KM and MC partitions for patient #4. Scale bars indicate 100  $\mu\text{m}$ . The quality measure  $f$  of each partition is provided above each pseudo-color-coded image. The cluster assignments are detailed below each pseudo-color-coded image.

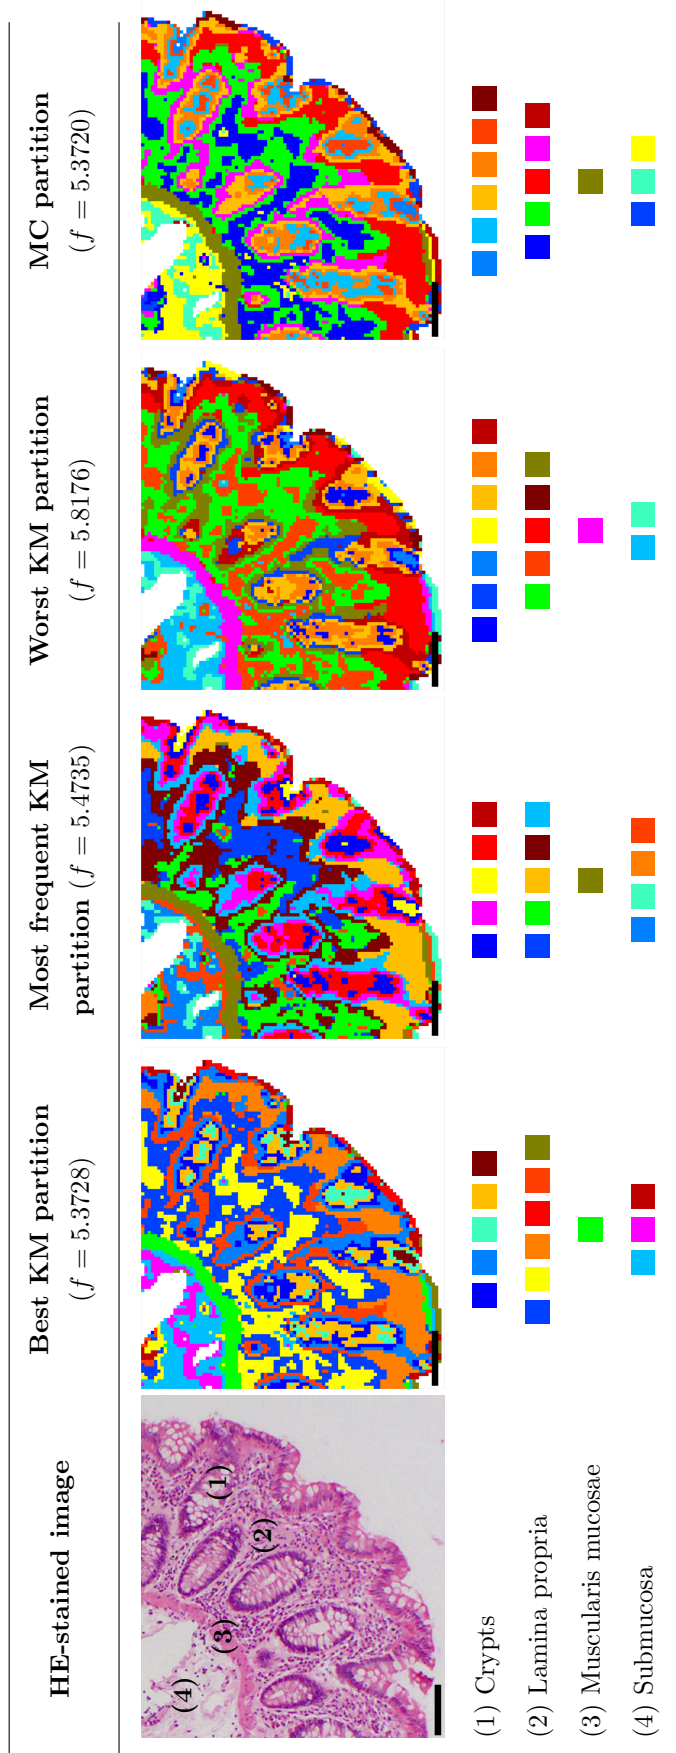

Figure S5: Comparison between conventional histology and pseudo-color-coded images reconstructed from KM and MC partitions for patient #5. Scale bars indicate 100  $\mu\text{m}$ .

The quality measure  $f$  of each partition is provided above each pseudo-color-coded image. The cluster assignments are detailed below each pseudo-color-coded image.



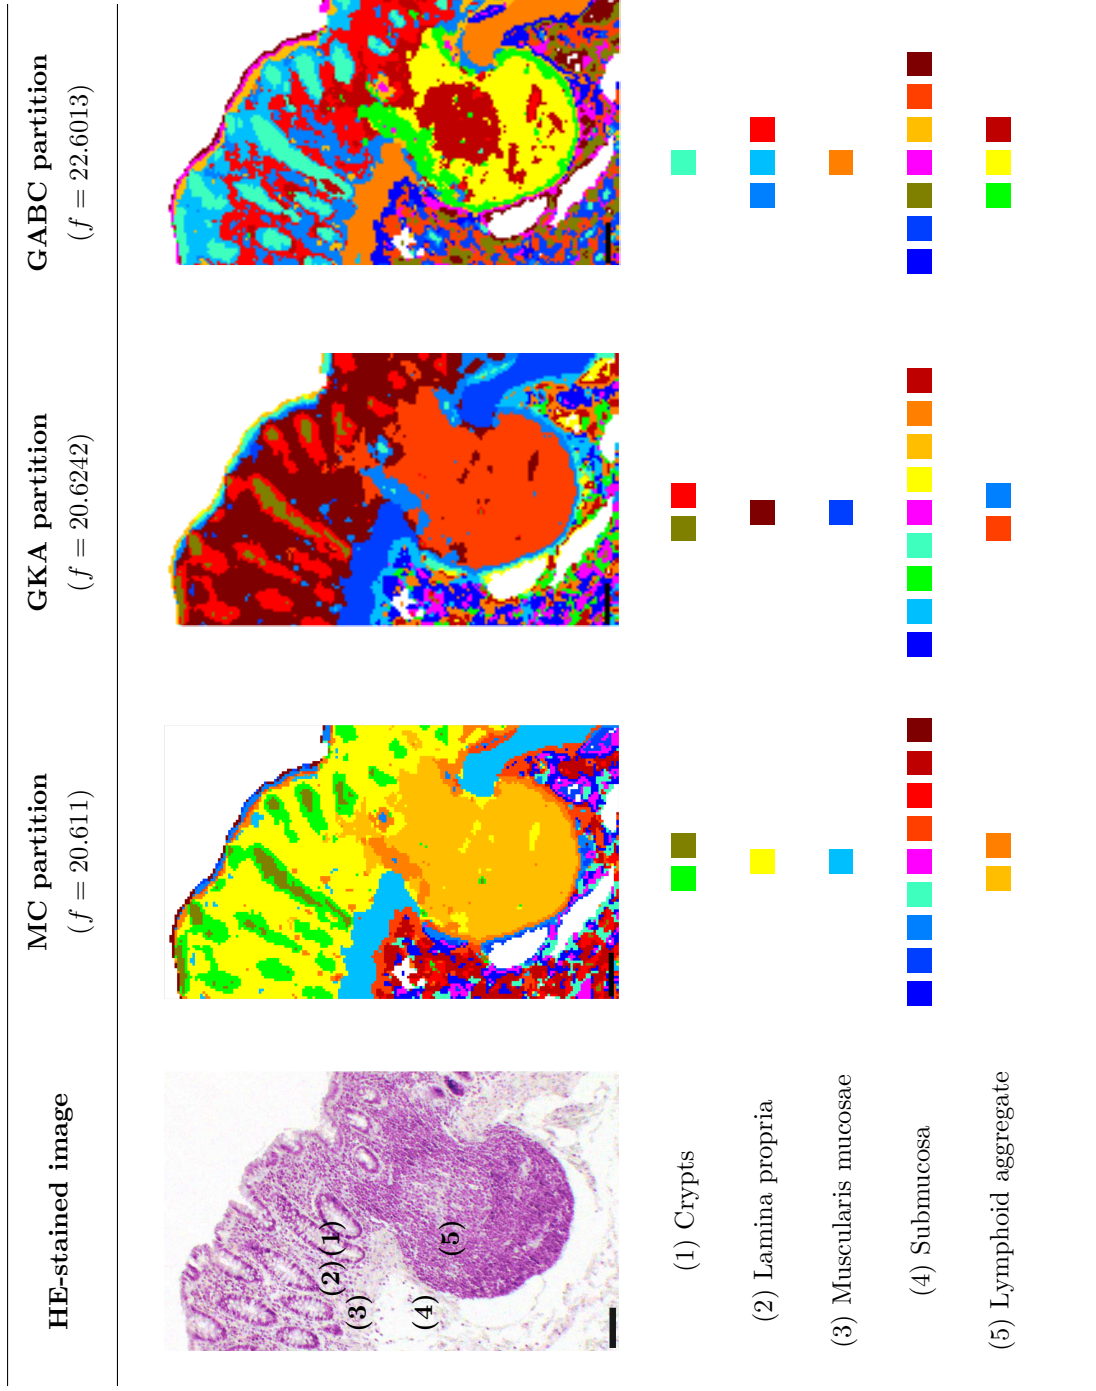

Figure S6: Comparison between conventional histology and pseudo-color-coded images reconstructed from MC, GKA and GABC partitions for patient #1. Scale bars indicate 100  $\mu\text{m}$ . The quality measure  $f$  of each partition is provided above each pseudo-color-coded image. The cluster assignments are detailed below each pseudo-color-coded image.
